# Supplementary material
Source: MDPI journal article supplement (https://www.mdpi.com/2071-1050/16/5/2115)
Supplement: s1 [file s1]

## Supplementary Table

Table S1. The coordinate information on sampling sites of black rockfish

| Areas        | Longitude | Latitude |
|--------------|-----------|----------|
| Reef area 1  | 121.4530  | 36.7020  |
|              | 121.4560  | 36.7020  |
|              | 121.4590  | 36.7020  |
| Reef area 2  | 121.4520  | 36.6860  |
|              | 121.4580  | 36.6860  |
|              | 121.4660  | 36.6860  |
| Control area | 121.4530  | 36.6700  |
|              | 121.4590  | 36.6700  |
|              | 121.4660  | 36.6700  |

Table S2. The coordinate information on zooplankton sampling sites

| Seasons | Areas         | Site number | Longitude | Latitude |
|---------|---------------|-------------|-----------|----------|
| Spring  | Reef area 1   | 1           | 121.4520  | 36.7040  |
|         |               | 2           | 121.4550  | 36.7040  |
|         |               | 3           | 121.4580  | 36.7040  |
|         | Reef area 2   | 4           | 121.4530  | 36.6880  |
|         |               | 5           | 121.4580  | 36.6870  |
|         |               | 6           | 121.4650  | 36.6880  |
|         | Offshore area | 7           | 121.4500  | 36.6700  |
|         |               | 8           | 121.4590  | 36.6700  |
|         |               | 9           | 121.4670  | 36.6700  |
|         | Inshore area  | 10          | 121.4660  | 36.6610  |
|         |               | 11          | 121.4030  | 36.7290  |
|         |               | 12          | 121.4130  | 36.7230  |
|         |               | 13          | 121.4330  | 36.7340  |
|         |               | 14          | 121.4560  | 36.7340  |
|         |               | 15          | 121.4928  | 36.7535  |
| Summer  | Reef area 1   | 1           | 121.4526  | 36.7019  |
|         |               | 2           | 121.4555  | 36.7019  |
|         |               | 3           | 121.4586  | 36.7018  |
|         | Reef area 2   | 4           | 121.4530  | 36.6848  |
|         |               | 5           | 121.4584  | 36.6848  |
|         |               | 6           | 121.4645  | 36.6848  |
|         | Offshore area | 7           | 121.4395  | 36.6703  |
|         |               | 8           | 121.4588  | 36.6700  |
|         |               | 9           | 121.4812  | 36.6721  |
|         | Inshore area  | 10          | 121.4530  | 36.6618  |
|         |               | 11          | 121.3921  | 36.7338  |
|         |               | 12          | 121.4416  | 36.7413  |

|        |               |    |          |         |
|--------|---------------|----|----------|---------|
|        |               | 13 | 121.4793 | 36.7555 |
| Autumn | Reef area 1   | 1  | 121.4579 | 36.7032 |
|        |               | 2  | 121.4631 | 36.7024 |
|        |               | 3  | 121.4607 | 36.6994 |
|        | Reef area 2   | 4  | 121.4576 | 36.6844 |
|        |               | 5  | 121.4643 | 36.6858 |
|        |               | 6  | 121.4634 | 36.6819 |
|        |               | 7  | 121.4566 | 36.6894 |
|        | Offshore area | 8  | 121.4593 | 36.6743 |
|        |               | 9  | 121.4583 | 36.6719 |
|        |               | 10 | 121.4576 | 36.6638 |
|        | Inshore area  | 11 | 121.4506 | 36.7346 |
|        |               | 12 | 121.4190 | 36.7388 |
|        |               | 13 | 121.4720 | 36.7519 |
| Winter | Reef area 1   | 1  | 121.4545 | 36.7045 |
|        |               | 2  | 121.4555 | 36.7018 |
|        |               | 3  | 121.4561 | 36.6998 |
|        | Reef area 2   | 4  | 121.4583 | 36.6894 |
|        |               | 5  | 121.4590 | 36.6853 |
|        |               | 6  | 121.4591 | 36.6820 |
|        | Offshore area | 7  | 121.4411 | 36.6667 |
|        |               | 8  | 121.4468 | 36.6648 |
|        |               | 9  | 121.4572 | 36.6608 |
|        |               | 10 | 121.4692 | 36.6657 |
|        | Inshore area  | 11 | 121.4095 | 36.7341 |
|        |               | 12 | 121.4338 | 36.7432 |
|        |               | 13 | 121.4693 | 36.7426 |
|        |               | 14 | 121.4633 | 36.7511 |
